# Supplementary material for: Modeling of Gully Erosion in Ethiopia as Influenced by Changes in Rainfall and Land Use Management Practices
Source: MDPI journal article supplement (doi:10.3390/land12050947), 2023-04-24
Supplement: s1 [file s1]

## Supplementary Material

### Supplementary Tables

**Table S1.** Detailed characteristics of the study watersheds.

| Characteristics (unit)                                 | Aba Gerima                           |                     |
|--------------------------------------------------------|--------------------------------------|---------------------|
| Watershed                                              | Kecha                                | Laguna              |
| Area (ha)                                              | 395.32                               | 339.42              |
| Elevation (m.a.s.l.)                                   | 1913.95–2121.99                      | 1946.52–2252.63     |
| Slope range, mean (°)                                  | 0.02–41.51, 8.04                     | 0.04–53.04, 14.51   |
| Drainage density (km km <sup>-2</sup> ) <sup>a</sup>   | 5.38                                 | 4.59                |
| Major soil types <sup>b</sup>                          | Luvisols, Regosols                   | Regosols, Leptosols |
| Major land use/land cover                              | Cultivated land                      | Cultivated land     |
| SWC practice <sup>c</sup>                              | Treated                              | Untreated           |
| Agro-ecology                                           | Midland                              |                     |
| Mean annual rainfall (mm)                              | 1343                                 |                     |
| Mean daily temperature (°C)                            | 17–31                                |                     |
| Climate                                                | Moist <i>Weyna Dega</i> <sup>d</sup> |                     |
| Major crops                                            | Teff, finger millet, wheat, maize    |                     |
| Rainfall erosivity                                     | Very high                            |                     |
| Major soil texture class <sup>b</sup>                  | Clay                                 |                     |
| Soil bulk density (g cm <sup>-3</sup> ) <sup>b</sup>   | 1.21–1.40                            |                     |
| Average soil penetration resistance (kPa) <sup>e</sup> | 2200                                 |                     |

Note: Teff (*Eragrostis tef*); finger millet (*Eleusine coracana*); wheat (*Triticum aestivum*); maize (*Zea mays*).

<sup>a</sup> Setargie et al. [17]; <sup>b</sup> Mekonnen [16]; <sup>c</sup> Berihun et al. [32]; <sup>d</sup> Hurni et al. [35].

<sup>e</sup> SWC: soil and water conservation practices (Kecha received high governmental and non-governmental SWC programs since 2011; Laguna has no SWC practices).

**Table S2.** Land use/land cover changes between 2005 and 2021 in Kecha and Laguna watersheds.

| LULC | Kecha        |             |              |             |                       |             | Laguna       |             |              |             |                       |             |
|------|--------------|-------------|--------------|-------------|-----------------------|-------------|--------------|-------------|--------------|-------------|-----------------------|-------------|
|      | 2005         |             | 2021         |             | Change<br>(2005–2021) |             | 2005         |             | 2021         |             | Change<br>(2005–2021) |             |
|      | Area<br>(ha) | Area<br>(%) | Area<br>(ha) | Area<br>(%) | Area<br>(ha)          | Area<br>(%) | Area<br>(ha) | Area<br>(%) | Area<br>(ha) | Area<br>(%) | Area<br>(ha)          | Area<br>(%) |
| BL   | 37.29        | 9.43        | 21.38        | 5.40        | 15.91                 | 4.02        | 57.33        | 16.89       | 50.17        | 14.78       | 7.16                  | 2.11        |
| CL   | 272.34       | 68.83       | 281.97       | 71.24       | -9.63                 | -2.40       | 219.14       | 64.56       | 205.29       | 60.47       | 13.85                 | 4.09        |
| FL   | 32.69        | 8.26        | 39.13        | 9.89        | -6.44                 | -1.62       | 42.72        | 12.59       | 43.80        | 12.90       | -1.08                 | -0.32       |
| GL   | 50.98        | 12.88       | 37.74        | 9.53        | 13.24                 | 3.35        | 18.03        | 5.31        | 23.56        | 6.94        | -5.53                 | -1.63       |
| KP   | 1.79         | 0.45        | 13.10        | 3.31        | -11.31                | -2.86       | 1.66         | 0.49        | 11.96        | 3.52        | -10.30                | -3.03       |
| ST   | 0.56         | 0.14        | 2.51         | 0.63        | -1.94                 | -0.49       | 0.55         | 0.16        | 4.69         | 1.38        | -4.15                 | -1.22       |

LULC: land use/land cover; BL: bushland; CL: cultivated land; FL: forest land; GL: grazing land; KP: khat plantation; ST: settlements.

**Table S3.** Major soil types in Kecha and Laguna watersheds.

| Soil type         | Kecha     |          | Soil type         | Laguna    |          |
|-------------------|-----------|----------|-------------------|-----------|----------|
|                   | Area (ha) | Area (%) |                   | Area (ha) | Area (%) |
| Cambic Cambisols  | 0.63      | 0.16     | Cambic Cambisols  | 59.02     | 17.39    |
| Chromic Cambisols | 0.69      | 0.17     | Chromic Cambisols | 48.20     | 14.20    |
| Eutric Regosols   | 78.91     | 19.96    | Eutric Regosols   | 117.85    | 34.72    |
| Haplic Luvisols   | 93.29     | 23.60    | Haplic Luvisols   | 0.04      | 0.01     |
| Leptosols         | 2.25      | 0.57     | Leptosols         | 14.91     | 4.39     |
| Lithic Leptosols  | 16.71     | 4.23     | Lithic Leptosols  | 95.89     | 28.25    |
| Luvisols          | 10.43     | 2.64     | Luvisols          | 3.35      | 0.99     |
| Nithic Luvisols   | 191.26    | 48.38    | Nithic Luvisols   | 0.16      | 0.05     |
| Vertisols         | 1.15      | 0.29     |                   |           |          |

**Table S4.** The hydrologic-soil-cover complexes and derived runoff curve number-II for Kecha and Laguna watersheds based on Soil Conservation Service (SCS) [38].

(a) For Kecha in 2005

| Land use        | Cover type               | Treatment    | Hydrologic condition | Curve number-II |       |       |       |
|-----------------|--------------------------|--------------|----------------------|-----------------|-------|-------|-------|
|                 |                          |              |                      | HSG A           | HSG B | HSG C | HSG D |
| Cultivated land | Row crops & Small grains | Straight row | Poor                 | 68.5            | 78.5  | 86    | 89.5  |
| Grazing land    |                          |              | Poor                 | 68              | 79    | 86    | 89    |
| Khat plantation |                          |              | Poor                 | 48              | 67    | 77    | 83    |
| Bushland        |                          |              | Fair                 | 35              | 56    | 70    | 77    |
| Forest land     |                          |              | Fair                 | 43              | 65    | 76    | 82    |
| Settlements     |                          |              | -                    | 76              | 85    | 89    | 91    |

HSG: hydrologic soil group

(b) For Kecha in 2021

| Land use        | Cover type               | Treatment            | Hydrologic condition | Curve number-II |       |       |       |
|-----------------|--------------------------|----------------------|----------------------|-----------------|-------|-------|-------|
|                 |                          |                      |                      | HSG A           | HSG B | HSG C | HSG D |
| Cultivated land | Row crops & Small grains | Contoured & Terraced | Good                 | 60.5            | 70.5  | 78    | 81    |
| Grazing land    |                          |                      | Fair                 | 49              | 69    | 79    | 84    |
| Khat plantation |                          |                      | Poor                 | 48              | 67    | 77    | 83    |
| Bushland        |                          |                      | Good                 | 30              | 48    | 65    | 73    |
| Forest land     |                          |                      | Good                 | 32              | 58    | 72    | 79    |
| Settlements     |                          |                      | -                    | 76              | 85    | 89    | 91    |

HSG: hydrologic soil group

(c) For Laguna in 2005

| Land use        | Cover type               | Treatment    | Hydrologic condition | Curve number-II |       |       |       |
|-----------------|--------------------------|--------------|----------------------|-----------------|-------|-------|-------|
|                 |                          |              |                      | HSG A           | HSG B | HSG C | HSG D |
| Cultivated land | Row crops & Small grains | Straight row | Poor                 | 68.5            | 78.5  | 86    | 89.5  |
| Grazing land    |                          |              | Poor                 | 68              | 79    | 86    | 89    |
| Khat plantation |                          |              | Poor                 | 48              | 67    | 77    | 83    |
| Bushland        |                          |              | Fair                 | 35              | 56    | 70    | 77    |
| Forest land     |                          |              | Fair                 | 43              | 65    | 76    | 82    |
| Settlements     |                          |              | -                    | 76              | 85    | 89    | 91    |

HSG: hydrologic soil group

(d) For Laguna in 2021

| Land use        | Cover type               | Treatment    | Hydrologic condition | Curve number-II |       |       |       |
|-----------------|--------------------------|--------------|----------------------|-----------------|-------|-------|-------|
|                 |                          |              |                      | HSG A           | HSG B | HSG C | HSG D |
| Cultivated land | Row crops & Small grains | Straight row | Poor                 | 68.5            | 78.5  | 86    | 89.5  |
| Grazing land    |                          |              | Poor                 | 68              | 79    | 86    | 89    |
| Khat plantation |                          |              | Poor                 | 48              | 67    | 77    | 83    |
| Bushland        |                          |              | Fair                 | 35              | 56    | 70    | 77    |
| Forest land     |                          |              | Fair                 | 43              | 65    | 76    | 82    |
| Settlements     |                          |              | -                    | 76              | 85    | 89    | 91    |

HSG: hydrologic soil group

**Table S5.** Descriptive statistics of erosion indices for different land use/land cover and rainfall scenarios in Kecha and Laguna watersheds.

| Watershed | Scenario                          |                                     | Erosion index ( <i>e</i> ) |       |      |          |
|-----------|-----------------------------------|-------------------------------------|----------------------------|-------|------|----------|
|           | Curve number                      | Rainfall<br>(mm day <sup>-1</sup> ) | Min.                       | Max.  | Mean | St. Dev. |
| Kecha     | CN <sub>2005</sub><br>(untreated) | 10                                  | 0.00                       | 0.05  | 0.00 | 0.00     |
|           |                                   | 30                                  | 0.00                       | 1.37  | 0.03 | 0.06     |
|           |                                   | 60                                  | 0.00                       | 8.78  | 0.15 | 0.29     |
|           |                                   | 100                                 | 0.00                       | 28.45 | 0.35 | 0.72     |
|           | CN <sub>2021</sub><br>(treated)   | 10                                  | 0.00                       | 0.01  | 0.00 | 0.00     |
|           |                                   | 30                                  | 0.00                       | 0.24  | 0.01 | 0.01     |
|           |                                   | 60                                  | 0.00                       | 2.36  | 0.04 | 0.07     |
|           |                                   | 100                                 | 0.00                       | 12.57 | 0.12 | 0.25     |
| Laguna    | CN <sub>2005</sub><br>(untreated) | 10                                  | 0.00                       | 0.06  | 0.00 | 0.00     |
|           |                                   | 30                                  | 0.00                       | 2.29  | 0.05 | 0.08     |
|           |                                   | 60                                  | 0.00                       | 17.44 | 0.25 | 0.47     |
|           |                                   | 100                                 | 0.00                       | 48.73 | 0.66 | 1.32     |
|           | CN <sub>2021</sub><br>(untreated) | 10                                  | 0.00                       | 0.06  | 0.00 | 0.00     |
|           |                                   | 30                                  | 0.00                       | 2.25  | 0.05 | 0.08     |
|           |                                   | 60                                  | 0.00                       | 13.03 | 0.25 | 0.46     |
|           |                                   | 100                                 | 0.00                       | 53.82 | 0.67 | 1.31     |

CN<sub>2005</sub>: Curve number scenario in 2005; CN<sub>2021</sub>: Curve number scenario in 2021; Min.: minimum; Max.: maximum; St. Dev.: standard deviation.

**Table S6.** Gully-based prediction performance of different erosion indices exceeding critical thresholds.

| Watershed | Scenario           |                                     | $e$  | Gully-based performance |        |       |      |              |              |       |       |       |                       |
|-----------|--------------------|-------------------------------------|------|-------------------------|--------|-------|------|--------------|--------------|-------|-------|-------|-----------------------|
|           | Curve number       | Rainfall<br>(mm day <sup>-1</sup> ) |      | TP                      | TN     | FP    | FN   | TPR          | TNR          | FPR   | FNR   | OA    | $\frac{TPR + TNR}{2}$ |
| Kecha     | CN <sub>2005</sub> | 10                                  | 0.01 | 85                      | 153741 | 4997  | 1370 | 0.058        | <b>0.969</b> | 0.031 | 0.942 | 0.960 | <b>0.513</b>          |
| Kecha     | CN <sub>2021</sub> | 10                                  | 0.01 | 0                       | 158604 | 4     | 1584 | 0.000        | <b>1.000</b> | 0.000 | 1.000 | 0.990 | <b>0.500</b>          |
| Laguna    | CN <sub>2005</sub> | 10                                  | 0.01 | 83                      | 126805 | 10199 | 458  | 0.153        | <b>0.926</b> | 0.074 | 0.847 | 0.923 | <b>0.539</b>          |
| Laguna    | CN <sub>2005</sub> | 10                                  | 0.05 | 0                       | 137000 | 4     | 541  | 0.000        | <b>1.000</b> | 0.000 | 1.000 | 0.996 | <b>0.500</b>          |
| Laguna    | CN <sub>2021</sub> | 10                                  | 0.01 | 143                     | 126408 | 10060 | 934  | 0.133        | <b>0.926</b> | 0.074 | 0.867 | 0.920 | <b>0.530</b>          |
| Laguna    | CN <sub>2021</sub> | 10                                  | 0.05 | 0                       | 136462 | 6     | 1077 | 0.000        | <b>1.000</b> | 0.000 | 1.000 | 0.992 | <b>0.500</b>          |
| Kecha     | CN <sub>2005</sub> | 30                                  | 0.01 | 722                     | 75699  | 83039 | 733  | <b>0.496</b> | <b>0.477</b> | 0.523 | 0.504 | 0.477 | <b>0.487</b>          |
| Kecha     | CN <sub>2005</sub> | 30                                  | 0.05 | 411                     | 121921 | 36817 | 1044 | 0.282        | <b>0.768</b> | 0.232 | 0.718 | 0.764 | <b>0.525</b>          |
| Kecha     | CN <sub>2005</sub> | 30                                  | 0.1  | 200                     | 143058 | 15680 | 1255 | 0.137        | <b>0.901</b> | 0.099 | 0.863 | 0.894 | <b>0.519</b>          |
| Kecha     | CN <sub>2005</sub> | 30                                  | 0.5  | 13                      | 158524 | 214   | 1442 | 0.009        | <b>0.999</b> | 0.001 | 0.991 | 0.990 | <b>0.504</b>          |
| Kecha     | CN <sub>2005</sub> | 30                                  | 1    | 1                       | 158730 | 8     | 1454 | 0.001        | <b>1.000</b> | 0.000 | 0.999 | 0.991 | <b>0.500</b>          |
| Kecha     | CN <sub>2021</sub> | 30                                  | 0.01 | 594                     | 114581 | 44027 | 990  | 0.375        | <b>0.722</b> | 0.278 | 0.625 | 0.719 | <b>0.549</b>          |
| Kecha     | CN <sub>2021</sub> | 30                                  | 0.05 | 43                      | 157503 | 1105  | 1541 | 0.027        | <b>0.993</b> | 0.007 | 0.973 | 0.983 | <b>0.510</b>          |
| Kecha     | CN <sub>2021</sub> | 30                                  | 0.1  | 7                       | 158514 | 94    | 1577 | 0.004        | <b>0.999</b> | 0.001 | 0.996 | 0.990 | <b>0.502</b>          |
| Laguna    | CN <sub>2005</sub> | 30                                  | 0.01 | 339                     | 54900  | 82104 | 202  | <b>0.627</b> | <b>0.401</b> | 0.599 | 0.373 | 0.402 | <b>0.514</b>          |
| Laguna    | CN <sub>2005</sub> | 30                                  | 0.05 | 241                     | 92303  | 44701 | 300  | <b>0.445</b> | <b>0.674</b> | 0.326 | 0.555 | 0.673 | <b>0.560</b>          |
| Laguna    | CN <sub>2005</sub> | 30                                  | 0.1  | 142                     | 113812 | 23192 | 399  | 0.262        | <b>0.831</b> | 0.169 | 0.738 | 0.828 | <b>0.547</b>          |
| Laguna    | CN <sub>2005</sub> | 30                                  | 0.5  | 7                       | 136352 | 652   | 534  | 0.013        | <b>0.995</b> | 0.005 | 0.987 | 0.991 | <b>0.504</b>          |
| Laguna    | CN <sub>2005</sub> | 30                                  | 1    | 0                       | 136937 | 67    | 541  | 0.000        | <b>1.000</b> | 0.000 | 1.000 | 0.996 | <b>0.500</b>          |
| Laguna    | CN <sub>2021</sub> | 30                                  | 0.01 | 650                     | 54123  | 82345 | 427  | <b>0.604</b> | 0.397        | 0.603 | 0.396 | 0.398 | <b>0.500</b>          |
| Laguna    | CN <sub>2021</sub> | 30                                  | 0.05 | 452                     | 91244  | 45224 | 625  | <b>0.420</b> | <b>0.669</b> | 0.331 | 0.580 | 0.667 | <b>0.544</b>          |
| Laguna    | CN <sub>2021</sub> | 30                                  | 0.1  | 265                     | 113014 | 23454 | 812  | 0.246        | <b>0.828</b> | 0.172 | 0.754 | 0.824 | <b>0.537</b>          |
| Laguna    | CN <sub>2021</sub> | 30                                  | 0.5  | 12                      | 135895 | 573   | 1065 | 0.011        | <b>0.996</b> | 0.004 | 0.989 | 0.988 | <b>0.503</b>          |
| Laguna    | CN <sub>2021</sub> | 30                                  | 1    | 0                       | 136393 | 75    | 1077 | 0.000        | <b>0.999</b> | 0.001 | 1.000 | 0.992 | <b>0.500</b>          |

|        |                    |     |      |     |        |        |      |       |       |       |       |       |       |
|--------|--------------------|-----|------|-----|--------|--------|------|-------|-------|-------|-------|-------|-------|
| Kecha  | CN <sub>2005</sub> | 60  | 0.01 | 810 | 63494  | 95244  | 645  | 0.557 | 0.400 | 0.600 | 0.443 | 0.401 | 0.478 |
| Kecha  | CN <sub>2005</sub> | 60  | 0.05 | 810 | 64313  | 944425 | 645  | 0.557 | 0.064 | 0.936 | 0.443 | 0.064 | 0.310 |
| Kecha  | CN <sub>2005</sub> | 60  | 0.1  | 555 | 101665 | 57073  | 900  | 0.381 | 0.640 | 0.360 | 0.619 | 0.638 | 0.511 |
| Kecha  | CN <sub>2005</sub> | 60  | 0.5  | 150 | 146948 | 11790  | 1305 | 0.103 | 0.926 | 0.074 | 0.897 | 0.918 | 0.514 |
| Kecha  | CN <sub>2005</sub> | 60  | 1    | 58  | 155790 | 2948   | 1397 | 0.040 | 0.981 | 0.019 | 0.960 | 0.973 | 0.511 |
| Kecha  | CN <sub>2005</sub> | 60  | 5    | 1   | 158716 | 22     | 1454 | 0.001 | 1.000 | 0.000 | 0.999 | 0.991 | 0.500 |
| Kecha  | CN <sub>2021</sub> | 60  | 0.01 | 874 | 63659  | 94949  | 710  | 0.552 | 0.401 | 0.599 | 0.448 | 0.403 | 0.477 |
| Kecha  | CN <sub>2021</sub> | 60  | 0.05 | 872 | 66032  | 92576  | 712  | 0.551 | 0.416 | 0.584 | 0.449 | 0.418 | 0.483 |
| Kecha  | CN <sub>2021</sub> | 60  | 0.1  | 295 | 140147 | 18461  | 1289 | 0.186 | 0.884 | 0.116 | 0.814 | 0.877 | 0.535 |
| Kecha  | CN <sub>2021</sub> | 60  | 0.5  | 15  | 158210 | 398    | 1569 | 0.009 | 0.997 | 0.003 | 0.991 | 0.988 | 0.503 |
| Kecha  | CN <sub>2021</sub> | 60  | 1    | 2   | 158562 | 46     | 1582 | 0.001 | 1.000 | 0.000 | 0.999 | 0.990 | 0.500 |
| Laguna | CN <sub>2005</sub> | 60  | 0.01 | 346 | 40155  | 96849  | 195  | 0.640 | 0.293 | 0.707 | 0.360 | 0.294 | 0.466 |
| Laguna | CN <sub>2005</sub> | 60  | 0.05 | 346 | 40567  | 96437  | 195  | 0.640 | 0.296 | 0.704 | 0.360 | 0.297 | 0.468 |
| Laguna | CN <sub>2005</sub> | 60  | 0.1  | 296 | 70714  | 66290  | 245  | 0.547 | 0.516 | 0.484 | 0.453 | 0.516 | 0.532 |
| Laguna | CN <sub>2005</sub> | 60  | 0.5  | 110 | 116794 | 20210  | 431  | 0.203 | 0.852 | 0.148 | 0.797 | 0.850 | 0.528 |
| Laguna | CN <sub>2005</sub> | 60  | 1    | 34  | 130367 | 6637   | 507  | 0.063 | 0.952 | 0.048 | 0.937 | 0.948 | 0.507 |
| Laguna | CN <sub>2005</sub> | 60  | 5    | 2   | 136844 | 160    | 539  | 0.004 | 0.999 | 0.001 | 0.996 | 0.995 | 0.501 |
| Laguna | CN <sub>2005</sub> | 60  | 10   | 0   | 136991 | 13     | 541  | 0.000 | 1.000 | 0.000 | 1.000 | 0.996 | 0.500 |
| Laguna | CN <sub>2021</sub> | 60  | 0.01 | 669 | 39937  | 96531  | 408  | 0.621 | 0.293 | 0.707 | 0.379 | 0.295 | 0.457 |
| Laguna | CN <sub>2021</sub> | 60  | 0.05 | 669 | 40363  | 96105  | 408  | 0.621 | 0.296 | 0.704 | 0.379 | 0.298 | 0.458 |
| Laguna | CN <sub>2021</sub> | 60  | 0.1  | 567 | 69335  | 67133  | 510  | 0.526 | 0.508 | 0.492 | 0.474 | 0.508 | 0.517 |
| Laguna | CN <sub>2021</sub> | 60  | 0.5  | 209 | 115935 | 20533  | 868  | 0.194 | 0.850 | 0.150 | 0.806 | 0.844 | 0.522 |
| Laguna | CN <sub>2021</sub> | 60  | 1    | 76  | 129868 | 6600   | 1001 | 0.071 | 0.952 | 0.048 | 0.929 | 0.945 | 0.511 |
| Laguna | CN <sub>2021</sub> | 60  | 5    | 2   | 136327 | 141    | 1075 | 0.002 | 0.999 | 0.001 | 0.998 | 0.991 | 0.500 |
| Laguna | CN <sub>2021</sub> | 60  | 10   | 0   | 136461 | 7      | 1077 | 0.000 | 1.000 | 0.000 | 1.000 | 0.992 | 0.500 |
| Kecha  | CN <sub>2005</sub> | 100 | 0.01 | 810 | 63487  | 95251  | 645  | 0.557 | 0.400 | 0.600 | 0.443 | 0.401 | 0.478 |
| Kecha  | CN <sub>2005</sub> | 100 | 0.05 | 810 | 63537  | 95201  | 645  | 0.557 | 0.400 | 0.600 | 0.443 | 0.402 | 0.478 |
| Kecha  | CN <sub>2005</sub> | 100 | 0.1  | 720 | 78446  | 80292  | 735  | 0.495 | 0.494 | 0.506 | 0.505 | 0.494 | 0.495 |



|        |                    |     |      |     |        |       |      |              |              |       |       |       |              |
|--------|--------------------|-----|------|-----|--------|-------|------|--------------|--------------|-------|-------|-------|--------------|
| Kecha  | CN <sub>2005</sub> | 100 | 0.5  | 335 | 126895 | 31843 | 1120 | 0.230        | <b>0.799</b> | 0.201 | 0.770 | 0.794 | <b>0.515</b> |
| Kecha  | CN <sub>2005</sub> | 100 | 1    | 176 | 143669 | 15069 | 1279 | 0.121        | <b>0.905</b> | 0.095 | 0.879 | 0.898 | <b>0.513</b> |
| Kecha  | CN <sub>2005</sub> | 100 | 5    | 18  | 158236 | 502   | 1437 | 0.012        | <b>0.997</b> | 0.003 | 0.988 | 0.988 | <b>0.505</b> |
| Kecha  | CN <sub>2005</sub> | 100 | 10   | 3   | 158677 | 61    | 1452 | 0.002        | <b>1.000</b> | 0.000 | 0.998 | 0.991 | <b>0.501</b> |
| Kecha  | CN <sub>2021</sub> | 100 | 0.01 | 874 | 63430  | 95178 | 710  | <b>0.552</b> | 0.400        | 0.600 | 0.448 | 0.401 | <b>0.476</b> |
| Kecha  | CN <sub>2021</sub> | 100 | 0.05 | 873 | 63802  | 94806 | 711  | <b>0.551</b> | <b>0.402</b> | 0.598 | 0.449 | 0.404 | <b>0.477</b> |
| Kecha  | CN <sub>2021</sub> | 100 | 0.1  | 612 | 106244 | 52364 | 972  | 0.386        | <b>0.670</b> | 0.330 | 0.614 | 0.667 | <b>0.528</b> |
| Kecha  | CN <sub>2021</sub> | 100 | 0.5  | 139 | 150209 | 8399  | 1445 | 0.088        | <b>0.947</b> | 0.053 | 0.912 | 0.939 | <b>0.517</b> |
| Kecha  | CN <sub>2021</sub> | 100 | 1    | 48  | 156781 | 1827  | 1536 | 0.030        | <b>0.988</b> | 0.012 | 0.970 | 0.979 | <b>0.509</b> |
| Kecha  | CN <sub>2021</sub> | 100 | 5    | 0   | 158574 | 34    | 1584 | 0.000        | <b>1.000</b> | 0.000 | 1.000 | 0.990 | <b>0.500</b> |
| Kecha  | CN <sub>2021</sub> | 100 | 10   | 0   | 158606 | 2     | 1584 | 0.000        | <b>1.000</b> | 0.000 | 1.000 | 0.990 | <b>0.500</b> |
| Laguna | CN <sub>2005</sub> | 100 | 0.01 | 346 | 40132  | 96872 | 195  | <b>0.640</b> | 0.293        | 0.707 | 0.360 | 0.294 | <b>0.466</b> |
| Laguna | CN <sub>2005</sub> | 100 | 0.05 | 346 | 40196  | 96808 | 195  | <b>0.640</b> | 0.293        | 0.707 | 0.360 | 0.295 | <b>0.466</b> |
| Laguna | CN <sub>2005</sub> | 100 | 0.1  | 338 | 47872  | 89132 | 203  | <b>0.625</b> | 0.349        | 0.651 | 0.375 | 0.351 | <b>0.487</b> |
| Laguna | CN <sub>2005</sub> | 100 | 0.5  | 202 | 90727  | 46277 | 339  | 0.373        | <b>0.662</b> | 0.338 | 0.627 | 0.661 | <b>0.518</b> |
| Laguna | CN <sub>2005</sub> | 100 | 1    | 128 | 110487 | 26517 | 413  | 0.237        | <b>0.806</b> | 0.194 | 0.763 | 0.804 | <b>0.522</b> |
| Laguna | CN <sub>2005</sub> | 100 | 5    | 8   | 135131 | 1873  | 533  | 0.015        | <b>0.986</b> | 0.014 | 0.985 | 0.983 | <b>0.501</b> |
| Laguna | CN <sub>2005</sub> | 100 | 10   | 2   | 136607 | 397   | 539  | 0.004        | <b>0.997</b> | 0.003 | 0.996 | 0.993 | <b>0.500</b> |
| Laguna | CN <sub>2021</sub> | 100 | 0.01 | 669 | 39918  | 96550 | 408  | <b>0.621</b> | 0.293        | 0.707 | 0.379 | 0.295 | <b>0.457</b> |
| Laguna | CN <sub>2021</sub> | 100 | 0.05 | 669 | 39970  | 96498 | 408  | <b>0.621</b> | 0.293        | 0.707 | 0.379 | 0.295 | <b>0.457</b> |
| Laguna | CN <sub>2021</sub> | 100 | 0.1  | 646 | 47954  | 88514 | 431  | <b>0.600</b> | 0.351        | 0.649 | 0.400 | 0.353 | <b>0.476</b> |
| Laguna | CN <sub>2021</sub> | 100 | 0.5  | 377 | 89221  | 47247 | 700  | 0.350        | <b>0.654</b> | 0.346 | 0.650 | 0.651 | <b>0.502</b> |
| Laguna | CN <sub>2021</sub> | 100 | 1    | 236 | 109028 | 27440 | 841  | 0.219        | <b>0.799</b> | 0.201 | 0.781 | 0.794 | <b>0.509</b> |
| Laguna | CN <sub>2021</sub> | 100 | 5    | 21  | 134710 | 1758  | 1056 | 0.019        | <b>0.987</b> | 0.013 | 0.981 | 0.980 | <b>0.503</b> |
| Laguna | CN <sub>2021</sub> | 100 | 10   | 2   | 136093 | 375   | 1075 | 0.002        | <b>0.997</b> | 0.003 | 0.998 | 0.989 | <b>0.500</b> |

CN<sub>2005</sub>: Curve number scenario in 2005; CN<sub>2021</sub>: Curve number scenario in 2021; *e*: Erosion index; TP: True positive; TN: True negative; FP: False positive; FN: False negative; TPR: True positive rate; TNR: True negative rate; FPR: False positive rate; FNR: False negative rate; OA: Overall accuracy.

Note: Values in bold red, yellow, and green colors indicate prediction performances between 0.4 and 0.45, 0.45 and 0.5, and greater than 0.5, respectively, while the green, yellow, and orange highlighted rows showed the best predictions in decreasing order achieved by a specific erosion index threshold.

**Table S7.** Gully head-based prediction performance of different erosion indices exceeding critical thresholds.

| Watershed | Scenario           |                                     | $e$  | Gully head-based performance |        |       |    |       |       |       |       |       |                       |
|-----------|--------------------|-------------------------------------|------|------------------------------|--------|-------|----|-------|-------|-------|-------|-------|-----------------------|
|           | Curve number       | Rainfall<br>(mm day <sup>-1</sup> ) |      | TP                           | TN     | FP    | FN | TPR   | TNR   | FPR   | FNR   | OA    | $\frac{TPR + TNR}{2}$ |
| Kecha     | CN <sub>2005</sub> | 10                                  | 0.01 | 0                            | 155078 | 5082  | 33 | 0.000 | 0.968 | 0.032 | 1.000 | 0.968 | 0.484                 |
| Kecha     | CN <sub>2021</sub> | 10                                  | 0.01 | 0                            | 160148 | 4     | 40 | 0.000 | 1.000 | 0.000 | 1.000 | 1.000 | 0.500                 |
| Laguna    | CN <sub>2005</sub> | 10                                  | 0.01 | 3                            | 127253 | 10279 | 10 | 0.231 | 0.925 | 0.075 | 0.769 | 0.925 | 0.578                 |
| Laguna    | CN <sub>2005</sub> | 10                                  | 0.05 | 0                            | 137528 | 4     | 13 | 0.000 | 1.000 | 0.000 | 1.000 | 1.000 | 0.500                 |
| Laguna    | CN <sub>2021</sub> | 10                                  | 0.01 | 3                            | 127320 | 10200 | 22 | 0.120 | 0.926 | 0.074 | 0.880 | 0.926 | 0.523                 |
| Laguna    | CN <sub>2021</sub> | 10                                  | 0.05 | 0                            | 137514 | 6     | 25 | 0.000 | 1.000 | 0.000 | 1.000 | 1.000 | 0.500                 |
| Kecha     | CN <sub>2005</sub> | 30                                  | 0.01 | 26                           | 76425  | 83735 | 7  | 0.788 | 0.477 | 0.523 | 0.212 | 0.477 | 0.633                 |
| Kecha     | CN <sub>2005</sub> | 30                                  | 0.05 | 14                           | 122946 | 37214 | 19 | 0.424 | 0.768 | 0.232 | 0.576 | 0.768 | 0.596                 |
| Kecha     | CN <sub>2005</sub> | 30                                  | 0.1  | 9                            | 144289 | 15871 | 24 | 0.273 | 0.901 | 0.099 | 0.727 | 0.901 | 0.587                 |
| Kecha     | CN <sub>2005</sub> | 30                                  | 0.5  | 1                            | 159934 | 226   | 32 | 0.030 | 0.999 | 0.001 | 0.970 | 0.998 | 0.514                 |
| Kecha     | CN <sub>2005</sub> | 30                                  | 1    | 0                            | 160151 | 9     | 33 | 0.000 | 1.000 | 0.000 | 1.000 | 1.000 | 0.500                 |
| Kecha     | CN <sub>2021</sub> | 30                                  | 0.01 | 18                           | 115549 | 44603 | 22 | 0.450 | 0.721 | 0.279 | 0.550 | 0.721 | 0.586                 |
| Kecha     | CN <sub>2021</sub> | 30                                  | 0.05 | 1                            | 159005 | 1147  | 39 | 0.025 | 0.993 | 0.007 | 0.975 | 0.993 | 0.509                 |
| Kecha     | CN <sub>2021</sub> | 30                                  | 0.1  | 0                            | 160051 | 101   | 40 | 0.000 | 0.999 | 0.001 | 1.000 | 0.999 | 0.500                 |
| Laguna    | CN <sub>2005</sub> | 30                                  | 0.01 | 11                           | 55100  | 82432 | 2  | 0.846 | 0.401 | 0.599 | 0.154 | 0.401 | 0.623                 |
| Laguna    | CN <sub>2005</sub> | 30                                  | 0.05 | 9                            | 92599  | 44933 | 4  | 0.692 | 0.673 | 0.327 | 0.308 | 0.673 | 0.683                 |
| Laguna    | CN <sub>2005</sub> | 30                                  | 0.1  | 4                            | 114202 | 23330 | 9  | 0.308 | 0.830 | 0.170 | 0.692 | 0.830 | 0.569                 |
| Laguna    | CN <sub>2005</sub> | 30                                  | 0.5  | 0                            | 136873 | 659   | 13 | 0.000 | 0.995 | 0.005 | 1.000 | 0.995 | 0.498                 |
| Laguna    | CN <sub>2005</sub> | 30                                  | 1    | 0                            | 137465 | 67    | 13 | 0.000 | 1.000 | 0.000 | 1.000 | 0.999 | 0.500                 |
| Laguna    | CN <sub>2021</sub> | 30                                  | 0.01 | 19                           | 54544  | 82976 | 6  | 0.760 | 0.397 | 0.603 | 0.240 | 0.397 | 0.578                 |
| Laguna    | CN <sub>2021</sub> | 30                                  | 0.05 | 11                           | 91855  | 45665 | 14 | 0.440 | 0.668 | 0.332 | 0.560 | 0.668 | 0.554                 |
| Laguna    | CN <sub>2021</sub> | 30                                  | 0.1  | 4                            | 113805 | 23715 | 21 | 0.160 | 0.828 | 0.172 | 0.840 | 0.827 | 0.494                 |
| Laguna    | CN <sub>2021</sub> | 30                                  | 0.5  | 0                            | 136935 | 585   | 25 | 0.000 | 0.996 | 0.004 | 1.000 | 0.996 | 0.498                 |
| Laguna    | CN <sub>2021</sub> | 30                                  | 1    | 0                            | 137445 | 75    | 25 | 0.000 | 0.999 | 0.001 | 1.000 | 0.999 | 0.500                 |

|        |                    |     |      |    |        |       |    |       |       |       |       |       |       |
|--------|--------------------|-----|------|----|--------|-------|----|-------|-------|-------|-------|-------|-------|
| Kecha  | CN <sub>2005</sub> | 60  | 0.01 | 28 | 64134  | 96026 | 5  | 0.848 | 0.400 | 0.600 | 0.152 | 0.401 | 0.624 |
| Kecha  | CN <sub>2005</sub> | 60  | 0.05 | 28 | 64953  | 95207 | 5  | 0.848 | 0.406 | 0.594 | 0.152 | 0.406 | 0.627 |
| Kecha  | CN <sub>2005</sub> | 60  | 0.1  | 18 | 102550 | 57610 | 15 | 0.545 | 0.640 | 0.360 | 0.455 | 0.640 | 0.593 |
| Kecha  | CN <sub>2005</sub> | 60  | 0.5  | 7  | 148227 | 11933 | 26 | 0.212 | 0.925 | 0.075 | 0.788 | 0.925 | 0.569 |
| Kecha  | CN <sub>2005</sub> | 60  | 1    | 2  | 157156 | 3004  | 31 | 0.061 | 0.981 | 0.019 | 0.939 | 0.981 | 0.521 |
| Kecha  | CN <sub>2005</sub> | 60  | 5    | 0  | 160137 | 23    | 33 | 0.000 | 1.000 | 0.000 | 1.000 | 1.000 | 0.500 |
| Kecha  | CN <sub>2021</sub> | 60  | 0.01 | 30 | 64359  | 95793 | 10 | 0.750 | 0.402 | 0.598 | 0.250 | 0.402 | 0.576 |
| Kecha  | CN <sub>2021</sub> | 60  | 0.05 | 30 | 66734  | 93418 | 10 | 0.750 | 0.417 | 0.583 | 0.250 | 0.417 | 0.583 |
| Kecha  | CN <sub>2021</sub> | 60  | 0.1  | 12 | 141408 | 18744 | 28 | 0.300 | 0.883 | 0.117 | 0.700 | 0.883 | 0.591 |
| Kecha  | CN <sub>2021</sub> | 60  | 0.5  | 1  | 159740 | 412   | 39 | 0.025 | 0.997 | 0.003 | 0.975 | 0.997 | 0.511 |
| Kecha  | CN <sub>2021</sub> | 60  | 1    | 0  | 160104 | 48    | 40 | 0.000 | 1.000 | 0.000 | 1.000 | 0.999 | 0.500 |
| Laguna | CN <sub>2005</sub> | 60  | 0.01 | 11 | 40348  | 97184 | 2  | 0.846 | 0.293 | 0.707 | 0.154 | 0.293 | 0.570 |
| Laguna | CN <sub>2005</sub> | 60  | 0.05 | 11 | 40760  | 96772 | 2  | 0.846 | 0.296 | 0.704 | 0.154 | 0.296 | 0.571 |
| Laguna | CN <sub>2005</sub> | 60  | 0.1  | 10 | 70956  | 66576 | 3  | 0.769 | 0.516 | 0.484 | 0.231 | 0.516 | 0.643 |
| Laguna | CN <sub>2005</sub> | 60  | 0.5  | 3  | 117215 | 20317 | 10 | 0.231 | 0.852 | 0.148 | 0.769 | 0.852 | 0.542 |
| Laguna | CN <sub>2005</sub> | 60  | 1    | 1  | 130862 | 6670  | 12 | 0.077 | 0.952 | 0.048 | 0.923 | 0.951 | 0.514 |
| Laguna | CN <sub>2005</sub> | 60  | 5    | 0  | 137370 | 162   | 13 | 0.000 | 0.999 | 0.001 | 1.000 | 0.999 | 0.499 |
| Laguna | CN <sub>2005</sub> | 60  | 10   | 0  | 137519 | 13    | 13 | 0.000 | 1.000 | 0.000 | 1.000 | 1.000 | 0.500 |
| Laguna | CN <sub>2021</sub> | 60  | 0.01 | 19 | 40339  | 97181 | 6  | 0.760 | 0.293 | 0.707 | 0.240 | 0.293 | 0.527 |
| Laguna | CN <sub>2021</sub> | 60  | 0.05 | 19 | 40765  | 96755 | 6  | 0.760 | 0.296 | 0.704 | 0.240 | 0.297 | 0.528 |
| Laguna | CN <sub>2021</sub> | 60  | 0.1  | 14 | 69834  | 67686 | 11 | 0.560 | 0.508 | 0.492 | 0.440 | 0.508 | 0.534 |
| Laguna | CN <sub>2021</sub> | 60  | 0.5  | 4  | 116782 | 20738 | 21 | 0.160 | 0.849 | 0.151 | 0.840 | 0.849 | 0.505 |
| Laguna | CN <sub>2021</sub> | 60  | 1    | 2  | 130846 | 6674  | 23 | 0.080 | 0.951 | 0.049 | 0.920 | 0.951 | 0.516 |
| Laguna | CN <sub>2021</sub> | 60  | 5    | 0  | 137377 | 143   | 25 | 0.000 | 0.999 | 0.001 | 1.000 | 0.999 | 0.499 |
| Laguna | CN <sub>2021</sub> | 60  | 10   | 0  | 137513 | 7     | 25 | 0.000 | 1.000 | 0.000 | 1.000 | 1.000 | 0.500 |
| Kecha  | CN <sub>2005</sub> | 100 | 0.01 | 28 | 64127  | 96033 | 5  | 0.848 | 0.400 | 0.600 | 0.152 | 0.400 | 0.624 |
| Kecha  | CN <sub>2005</sub> | 100 | 0.05 | 28 | 64177  | 95983 | 5  | 0.848 | 0.401 | 0.599 | 0.152 | 0.401 | 0.625 |
| Kecha  | CN <sub>2005</sub> | 100 | 0.1  | 25 | 79173  | 80987 | 8  | 0.758 | 0.494 | 0.506 | 0.242 | 0.494 | 0.626 |

|        |                    |     |      |    |        |       |    |       |       |       |       |       |       |
|--------|--------------------|-----|------|----|--------|-------|----|-------|-------|-------|-------|-------|-------|
| Kecha  | CN <sub>2005</sub> | 100 | 0.5  | 13 | 127995 | 32165 | 20 | 0.394 | 0.799 | 0.201 | 0.606 | 0.799 | 0.597 |
| Kecha  | CN <sub>2005</sub> | 100 | 1    | 8  | 144923 | 15237 | 25 | 0.242 | 0.905 | 0.095 | 0.758 | 0.905 | 0.574 |
| Kecha  | CN <sub>2005</sub> | 100 | 5    | 1  | 159641 | 519   | 32 | 0.030 | 0.997 | 0.003 | 0.970 | 0.997 | 0.514 |
| Kecha  | CN <sub>2005</sub> | 100 | 10   | 0  | 160096 | 64    | 33 | 0.000 | 1.000 | 0.000 | 1.000 | 0.999 | 0.500 |
| Kecha  | CN <sub>2021</sub> | 100 | 0.01 | 30 | 64130  | 96022 | 10 | 0.750 | 0.400 | 0.600 | 0.250 | 0.401 | 0.575 |
| Kecha  | CN <sub>2021</sub> | 100 | 0.05 | 30 | 64503  | 95649 | 10 | 0.750 | 0.403 | 0.597 | 0.250 | 0.403 | 0.576 |
| Kecha  | CN <sub>2021</sub> | 100 | 0.1  | 21 | 107197 | 52955 | 19 | 0.525 | 0.669 | 0.331 | 0.475 | 0.669 | 0.597 |
| Kecha  | CN <sub>2021</sub> | 100 | 0.5  | 4  | 151618 | 8534  | 36 | 0.100 | 0.947 | 0.053 | 0.900 | 0.947 | 0.523 |
| Kecha  | CN <sub>2021</sub> | 100 | 1    | 2  | 158279 | 1873  | 38 | 0.050 | 0.988 | 0.012 | 0.950 | 0.988 | 0.519 |
| Kecha  | CN <sub>2021</sub> | 100 | 5    | 0  | 160118 | 34    | 40 | 0.000 | 1.000 | 0.000 | 1.000 | 1.000 | 0.500 |
| Kecha  | CN <sub>2021</sub> | 100 | 10   | 0  | 160150 | 2     | 40 | 0.000 | 1.000 | 0.000 | 1.000 | 1.000 | 0.500 |
| Laguna | CN <sub>2005</sub> | 100 | 0.01 | 11 | 40325  | 97207 | 2  | 0.846 | 0.293 | 0.707 | 0.154 | 0.293 | 0.570 |
| Laguna | CN <sub>2005</sub> | 100 | 0.05 | 11 | 40389  | 97143 | 2  | 0.846 | 0.294 | 0.706 | 0.154 | 0.294 | 0.570 |
| Laguna | CN <sub>2005</sub> | 100 | 0.1  | 11 | 48073  | 89459 | 2  | 0.846 | 0.350 | 0.650 | 0.154 | 0.350 | 0.598 |
| Laguna | CN <sub>2005</sub> | 100 | 0.5  | 7  | 91060  | 46472 | 6  | 0.538 | 0.662 | 0.338 | 0.462 | 0.662 | 0.600 |
| Laguna | CN <sub>2005</sub> | 100 | 1    | 3  | 110890 | 26642 | 10 | 0.231 | 0.806 | 0.194 | 0.769 | 0.806 | 0.519 |
| Laguna | CN <sub>2005</sub> | 100 | 5    | 0  | 135651 | 1881  | 13 | 0.000 | 0.986 | 0.014 | 1.000 | 0.986 | 0.493 |
| Laguna | CN <sub>2005</sub> | 100 | 10   | 0  | 137133 | 399   | 13 | 0.000 | 0.997 | 0.003 | 1.000 | 0.997 | 0.499 |
| Laguna | CN <sub>2021</sub> | 100 | 0.01 | 19 | 40320  | 97200 | 6  | 0.760 | 0.293 | 0.707 | 0.240 | 0.293 | 0.527 |
| Laguna | CN <sub>2021</sub> | 100 | 0.05 | 19 | 40372  | 97148 | 6  | 0.760 | 0.294 | 0.706 | 0.240 | 0.294 | 0.527 |
| Laguna | CN <sub>2021</sub> | 100 | 0.1  | 19 | 48379  | 89141 | 6  | 0.760 | 0.352 | 0.648 | 0.240 | 0.352 | 0.556 |
| Laguna | CN <sub>2021</sub> | 100 | 0.5  | 10 | 89906  | 47614 | 15 | 0.400 | 0.654 | 0.346 | 0.600 | 0.654 | 0.527 |
| Laguna | CN <sub>2021</sub> | 100 | 1    | 5  | 109849 | 27671 | 20 | 0.200 | 0.799 | 0.201 | 0.800 | 0.799 | 0.499 |
| Laguna | CN <sub>2021</sub> | 100 | 5    | 1  | 135742 | 1778  | 24 | 0.040 | 0.987 | 0.013 | 0.960 | 0.987 | 0.514 |
| Laguna | CN <sub>2021</sub> | 100 | 10   | 0  | 137143 | 377   | 25 | 0.000 | 0.997 | 0.003 | 1.000 | 0.997 | 0.499 |

CN<sub>2005</sub>: Curve number scenario in 2005; CN<sub>2021</sub>: Curve number scenario in 2021; e: Erosion index; TP: True positive; TN: True negative; FP: False positive; FN: False negative; TPR: True positive rate; TNR: True negative rate; FPR: False positive rate; FNR: False negative rate; OA: Overall accuracy.

Note: Values in bold red, yellow, and green colors indicate prediction performances between 0.4 and 0.45, 0.45 and 0.5, and greater than 0.5, respectively, while the green, yellow, and orange highlighted rows showed the best predictions in decreasing order achieved by a specific erosion index threshold.

**Table S8.** SWAT validated curve number values based on 42 field plot experiments in the Upper Blue Nile basin of Ethiopia for different land use management options [adopted from Berihun et al. [10]].

| LULC            | LUM options      | CN2    |
|-----------------|------------------|--------|
| Cultivated land | Bund+Grass       | r_0.47 |
| Grazing land    | Exclosure        | r_0.35 |
| Bushland        | Trench+Exclosure | r_0.32 |
| Khat plantation | Napier/desmodium | r_0.34 |

SWAT: Soil and Water Assessment Tool; LULC: land use/land cover; LUM: land use management; CN2: runoff curve number-II

Note: r\_ indicates that the calibrated value in SWAT was multiplied by the reported value during the mathematical operation.
